# Supplementary material
Source: ML conference proceedings conference paper supplement (https://proceedings.mlr.press/v209/yoshida23a.html)
Supplement: Supplementary file 1 [file yoshida23a-supp.pdf]

# Supplementary Materials for “Bayesian Active Questionnaire Design for Cause-of-Death Assignment Using Verbal Autopsies”

**Toshiya Yoshida**

*University of California Santa Cruz, USA*

TOYOSHID@UCSC.EDU

**Trinity Shuxian Fan**

*University of Washington, USA*

FANSX@UW.EDU

**Tyler McCormick**

*University of Washington, USA*

TYLERMC@UW.EDU

**Zhenke Wu**

*University of Michigan, USA*

ZHENKEWU@UMICH.EDU

**Zehang Richard Li**

*University of California Santa Cruz, USA*

LIZEHANG@UCSC.EDU

## 1. Additional results for the synthetic data examples

Tables 1 and 2 contain more extensive results on the classification accuracy and questionnaire length for the synthetic data under the correctly specified model and misspecified models, respectively.

## 2. Additional results for the PHMRC data example

### 2.1. Descriptive statistics of the PHMRC dataset

Table 3 summarizes the sample size of each cause of death in the PHMRC data.

### 2.2. More results of different stopping rules

Figures 1 to 5 show more detailed results for the proportion of correctly classified deaths among deaths due to each cause of death using different stopping criteria.

Table 1: Classification accuracy and questionnaire length for the synthetic data under the correctly specified model. Median and 5th and 95th percentiles of the questionnaire length are shown for each stopping rule conditions.

| $p_{1st}$ | $d$  | Stopping Rule  | Acc  | Median | Lower | Upper |
|-----------|------|----------------|------|--------|-------|-------|
| 0.8       | 0.75 | Point Est      | 0.84 | 5      | 3     | 14    |
|           |      | Pred $r = 0.5$ | 0.92 | 10     | 4     | 50    |
|           |      | Pred $r = 0.7$ | 0.95 | 13     | 6     | 50    |
| 0.8       | 0.5  | Point Est      | 0.85 | 5      | 3     | 14    |
|           |      | Pred $r = 0.5$ | 0.92 | 10     | 4     | 50    |
|           |      | Pred $r = 0.7$ | 0.95 | 14     | 6     | 50    |
| 0.8       | 0.25 | Point Est      | 0.88 | 6      | 3     | 16    |
|           |      | Pred $r = 0.5$ | 0.94 | 10     | 4     | 50    |
|           |      | Pred $r = 0.7$ | 0.96 | 15     | 6     | 50    |
| 0.8       | 0    | Point Est      | 0.96 | 8      | 5     | 35    |
|           |      | Pred $r = 0.5$ | 0.96 | 13     | 6     | 50    |
|           |      | Pred $r = 0.7$ | 0.96 | 20     | 7     | 50    |
| 0.9       | 0.75 | Point Est      | 0.95 | 7      | 5     | 17    |
|           |      | Pred $r = 0.5$ | 0.95 | 12     | 6     | 50    |
|           |      | Pred $r = 0.7$ | 0.96 | 17     | 7     | 50    |
| 0.9       | 0.5  | Point Est      | 0.95 | 7      | 5     | 18    |
|           |      | Pred $r = 0.5$ | 0.95 | 12     | 6     | 50    |
|           |      | Pred $r = 0.7$ | 0.96 | 18     | 7     | 50    |
| 0.9       | 0.25 | Point Est      | 0.95 | 7      | 5     | 24    |
|           |      | Pred $r = 0.5$ | 0.96 | 12     | 6     | 50    |
|           |      | Pred $r = 0.7$ | 0.96 | 18     | 7     | 50    |
| 0.9       | 0    | Point Est      | 0.97 | 10     | 7     | 50    |
|           |      | Pred $r = 0.5$ | 0.96 | 16     | 8     | 50    |
|           |      | Pred $r = 0.7$ | 0.96 | 23     | 8     | 50    |
| 0.95      | 0.75 | Point Est      | 0.97 | 9      | 6     | 24    |
|           |      | Pred $r = 0.5$ | 0.96 | 13     | 7     | 50    |
|           |      | Pred $r = 0.7$ | 0.96 | 18     | 8     | 50    |
| 0.95      | 0.5  | Point Est      | 0.97 | 9      | 6     | 35    |
|           |      | Pred $r = 0.5$ | 0.96 | 13     | 7     | 50    |
|           |      | Pred $r = 0.7$ | 0.96 | 20     | 8     | 50    |
| 0.95      | 0.25 | Point Est      | 0.97 | 10     | 6     | 50    |
|           |      | Pred $r = 0.5$ | 0.96 | 15     | 7     | 50    |
|           |      | Pred $r = 0.7$ | 0.97 | 22     | 8     | 50    |
| 0.95      | 0    | Point Est      | 0.98 | 12     | 8     | 50    |
|           |      | Pred $r = 0.5$ | 0.96 | 20     | 8     | 50    |
|           |      | Pred $r = 0.7$ | 0.97 | 26     | 9     | 50    |

Table 2: Classification accuracy and questionnaire length for the synthetic data under the misspecified model. Median and 5th and 95th percentiles of the questionnaire length are shown for each stopping rule conditions.

| $p_{1st}$ | $d$  | Stopping Rule  | Acc  | Median | Lower | Upper |
|-----------|------|----------------|------|--------|-------|-------|
| 0.8       | 0.75 | Point Est      | 0.86 | 4      | 3     | 11    |
|           |      | Pred $r = 0.5$ | 0.88 | 4      | 3     | 18    |
|           |      | Pred $r = 0.7$ | 0.94 | 5      | 3     | 25    |
| 0.8       | 0.5  | Point Est      | 0.88 | 5      | 3     | 11    |
|           |      | Pred $r = 0.5$ | 0.88 | 4      | 3     | 18    |
|           |      | Pred $r = 0.7$ | 0.94 | 5      | 3     | 27    |
| 0.8       | 0.25 | Point Est      | 0.90 | 5      | 3     | 11    |
|           |      | Pred $r = 0.5$ | 0.90 | 4      | 3     | 22    |
|           |      | Pred $r = 0.7$ | 0.94 | 6      | 3     | 30    |
| 0.8       | 0    | Point Est      | 0.96 | 6      | 5     | 17    |
|           |      | Pred $r = 0.5$ | 0.94 | 6      | 4     | 30    |
|           |      | Pred $r = 0.7$ | 0.99 | 8      | 5     | 50    |
| 0.9       | 0.75 | Point Est      | 0.94 | 6      | 4     | 12    |
|           |      | Pred $r = 0.5$ | 0.96 | 6      | 4     | 23    |
|           |      | Pred $r = 0.7$ | 0.98 | 7      | 4     | 50    |
| 0.9       | 0.5  | Point Est      | 0.94 | 6      | 4     | 13    |
|           |      | Pred $r = 0.5$ | 0.96 | 6      | 4     | 23    |
|           |      | Pred $r = 0.7$ | 0.98 | 7      | 4     | 50    |
| 0.9       | 0.25 | Point Est      | 0.94 | 6      | 4     | 16    |
|           |      | Pred $r = 0.5$ | 0.96 | 6      | 4     | 23    |
|           |      | Pred $r = 0.7$ | 0.99 | 7      | 4     | 50    |
| 0.9       | 0    | Point Est      | 0.96 | 7      | 6     | 20    |
|           |      | Pred $r = 0.5$ | 0.98 | 8      | 5     | 42    |
|           |      | Pred $r = 0.7$ | 0.99 | 9      | 5     | 50    |
| 0.95      | 0.75 | Point Est      | 0.96 | 7      | 5     | 16    |
|           |      | Pred $r = 0.5$ | 0.98 | 7      | 5     | 33    |
|           |      | Pred $r = 0.7$ | 0.98 | 8      | 5     | 50    |
| 0.95      | 0.5  | Point Est      | 0.96 | 7      | 5     | 17    |
|           |      | Pred $r = 0.5$ | 0.98 | 7      | 5     | 33    |
|           |      | Pred $r = 0.7$ | 0.99 | 9      | 5     | 50    |
| 0.95      | 0.25 | Point Est      | 0.96 | 7      | 5     | 17    |
|           |      | Pred $r = 0.5$ | 0.98 | 8      | 5     | 34    |
|           |      | Pred $r = 0.7$ | 0.99 | 9      | 5     | 50    |
| 0.95      | 0    | Point Est      | 0.98 | 8      | 6     | 25    |
|           |      | Pred $r = 0.5$ | 0.99 | 8      | 6     | 50    |
|           |      | Pred $r = 0.7$ | 0.99 | 10     | 6     | 50    |

| Cause of death                        | Sample Size |
|---------------------------------------|-------------|
| Stroke                                | 630         |
| Other Non-communicable Diseases (NCD) | 599         |
| Pneumonia                             | 540         |
| AIDS                                  | 502         |
| Maternal                              | 468         |
| Other Cardiovascular Diseases         | 416         |
| Renal Failure                         | 416         |
| Diabetes                              | 414         |
| Acute Myocardial Infarction           | 400         |
| Cirrhosis                             | 313         |
| TB                                    | 276         |
| Other Infectious Diseases             | 263         |
| Diarrhea/Dysentery                    | 228         |
| Road Traffic                          | 202         |
| Breast Cancer                         | 195         |
| Falls                                 | 173         |
| COPD                                  | 171         |
| Homicide                              | 167         |
| Leukemia/Lymphomas                    | 156         |
| Cervical Cancer                       | 155         |
| Suicide                               | 124         |
| Fires                                 | 122         |
| Drowning                              | 106         |
| Lung Cancer                           | 106         |
| Other Injuries                        | 103         |
| Malaria                               | 100         |
| Colorectal Cancer                     | 99          |
| Poisonings                            | 86          |
| Bite of Venomous Animal               | 66          |
| Stomach Cancer                        | 62          |
| Epilepsy                              | 48          |
| Prostate Cancer                       | 48          |
| Asthma                                | 47          |
| Esophageal Cancer                     | 40          |

Table 3: Sample size of each cause of death in the PHMRC dataset.

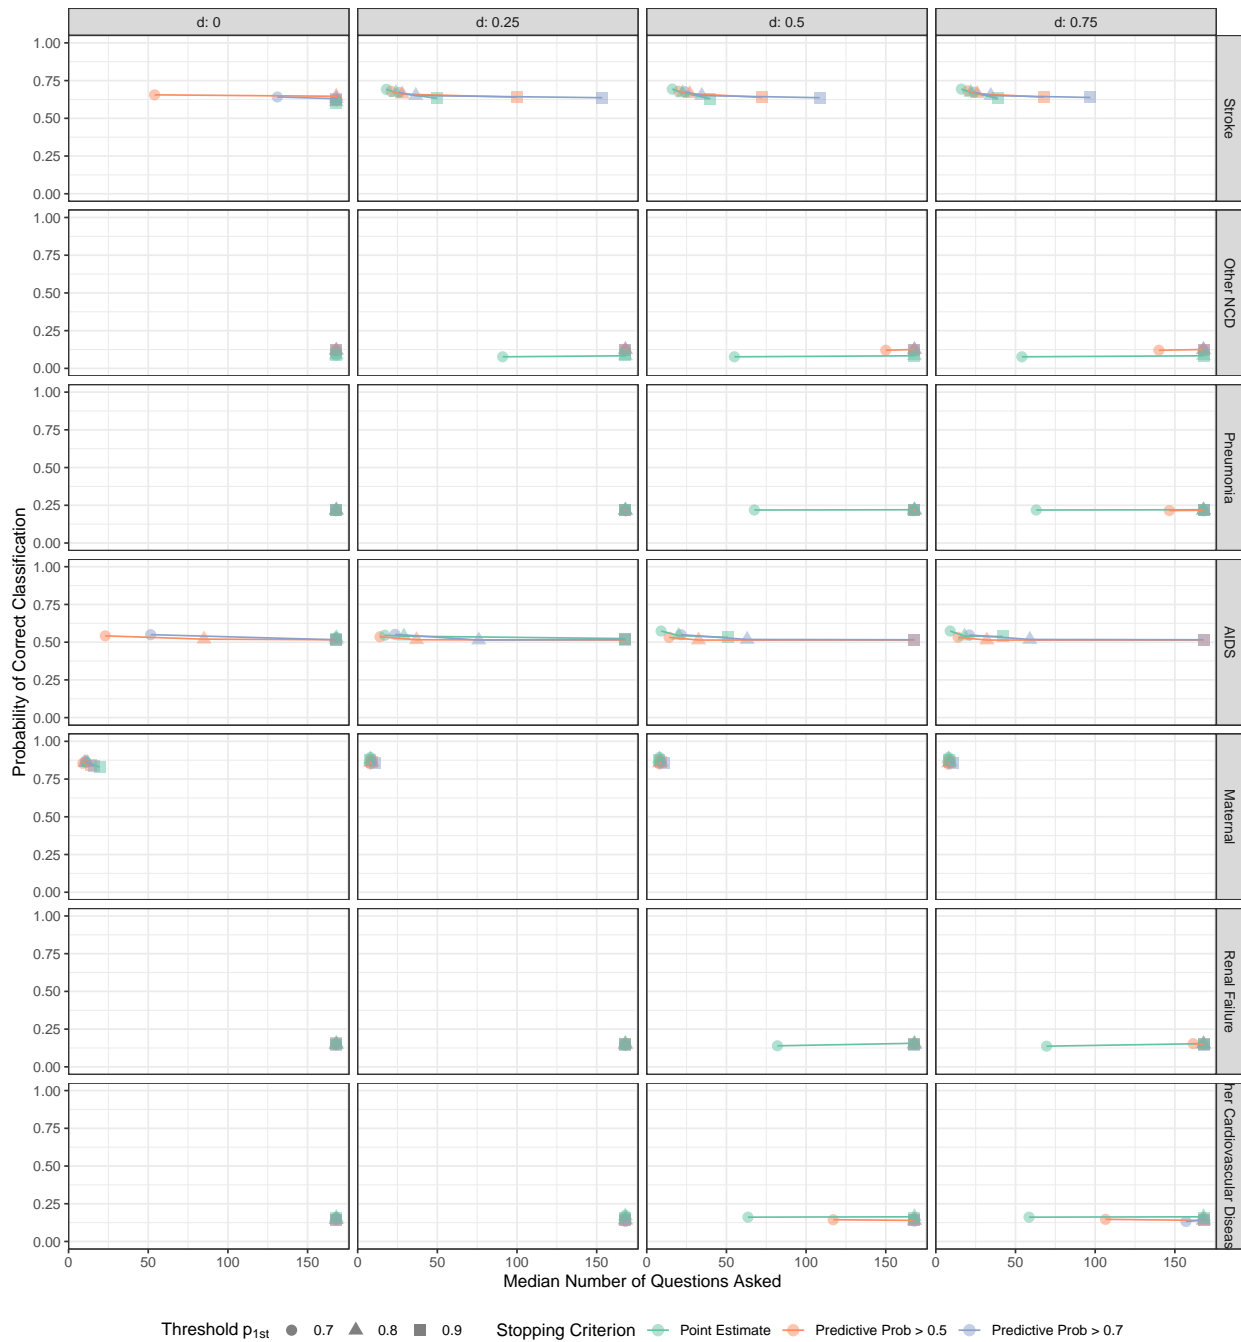

Figure 1: Proportion of correctly classified deaths among deaths due to each cause using different stopping criteria. The causes are ordered by their sample size in the PHMRC data.

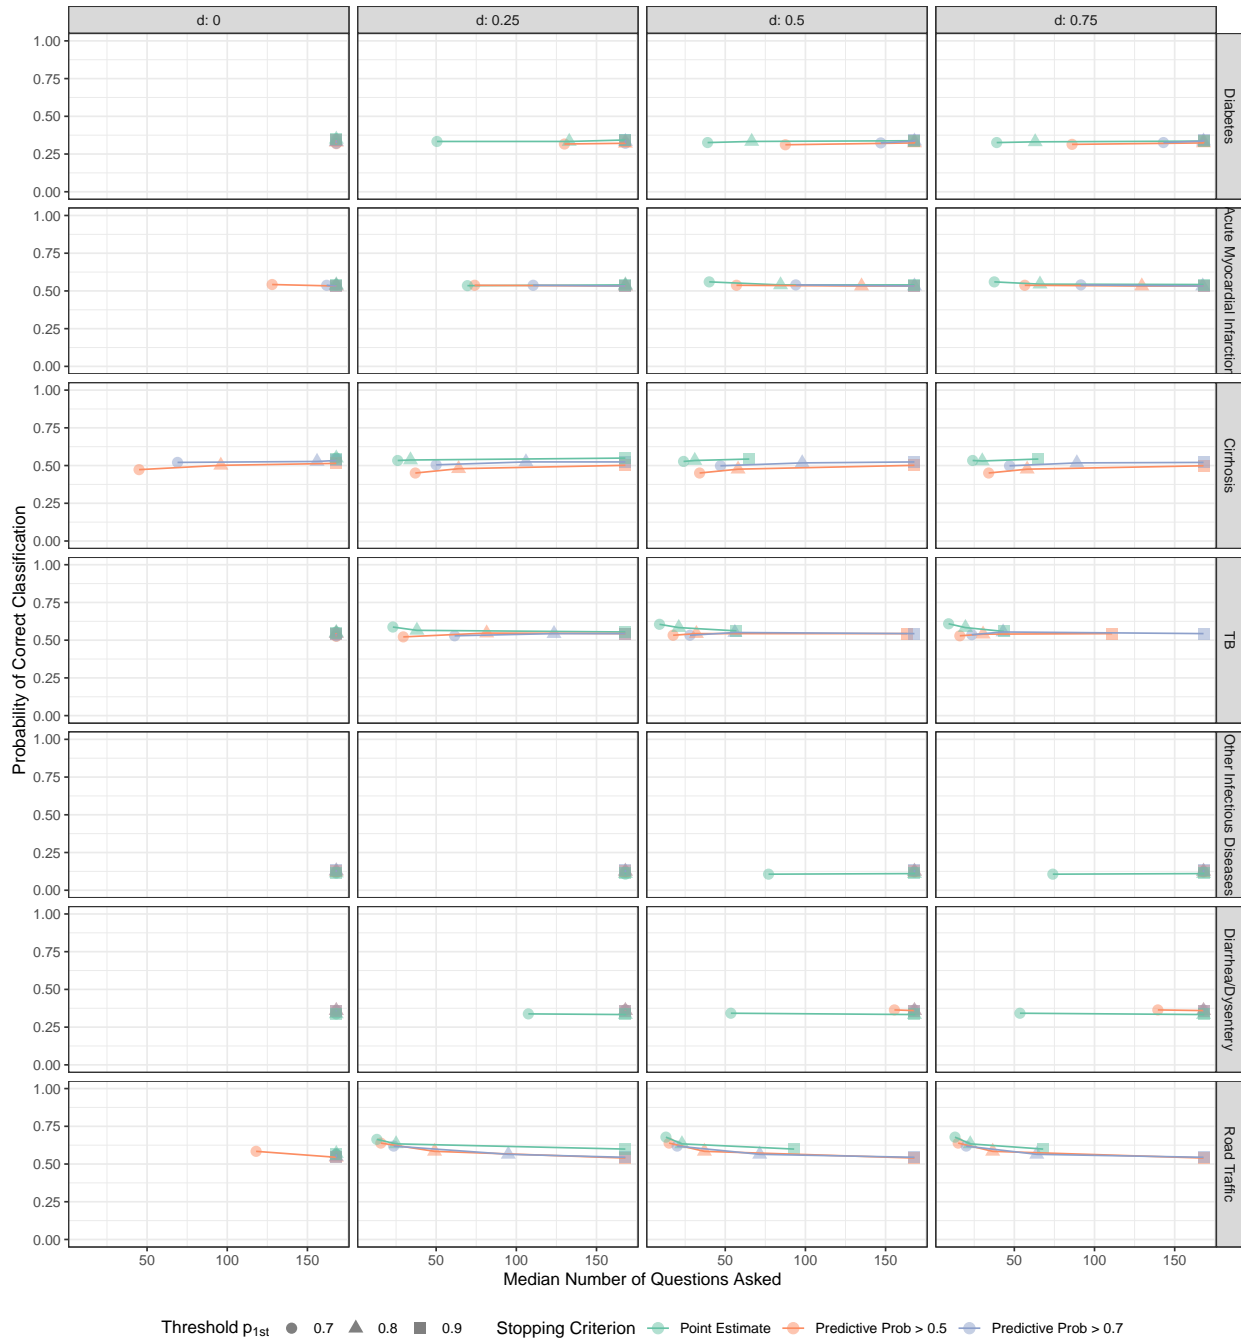

Figure 2: (Continued) Proportion of correctly classified deaths among deaths due to each cause using different stopping criteria. The causes are ordered by their sample size in the PHMRC data.

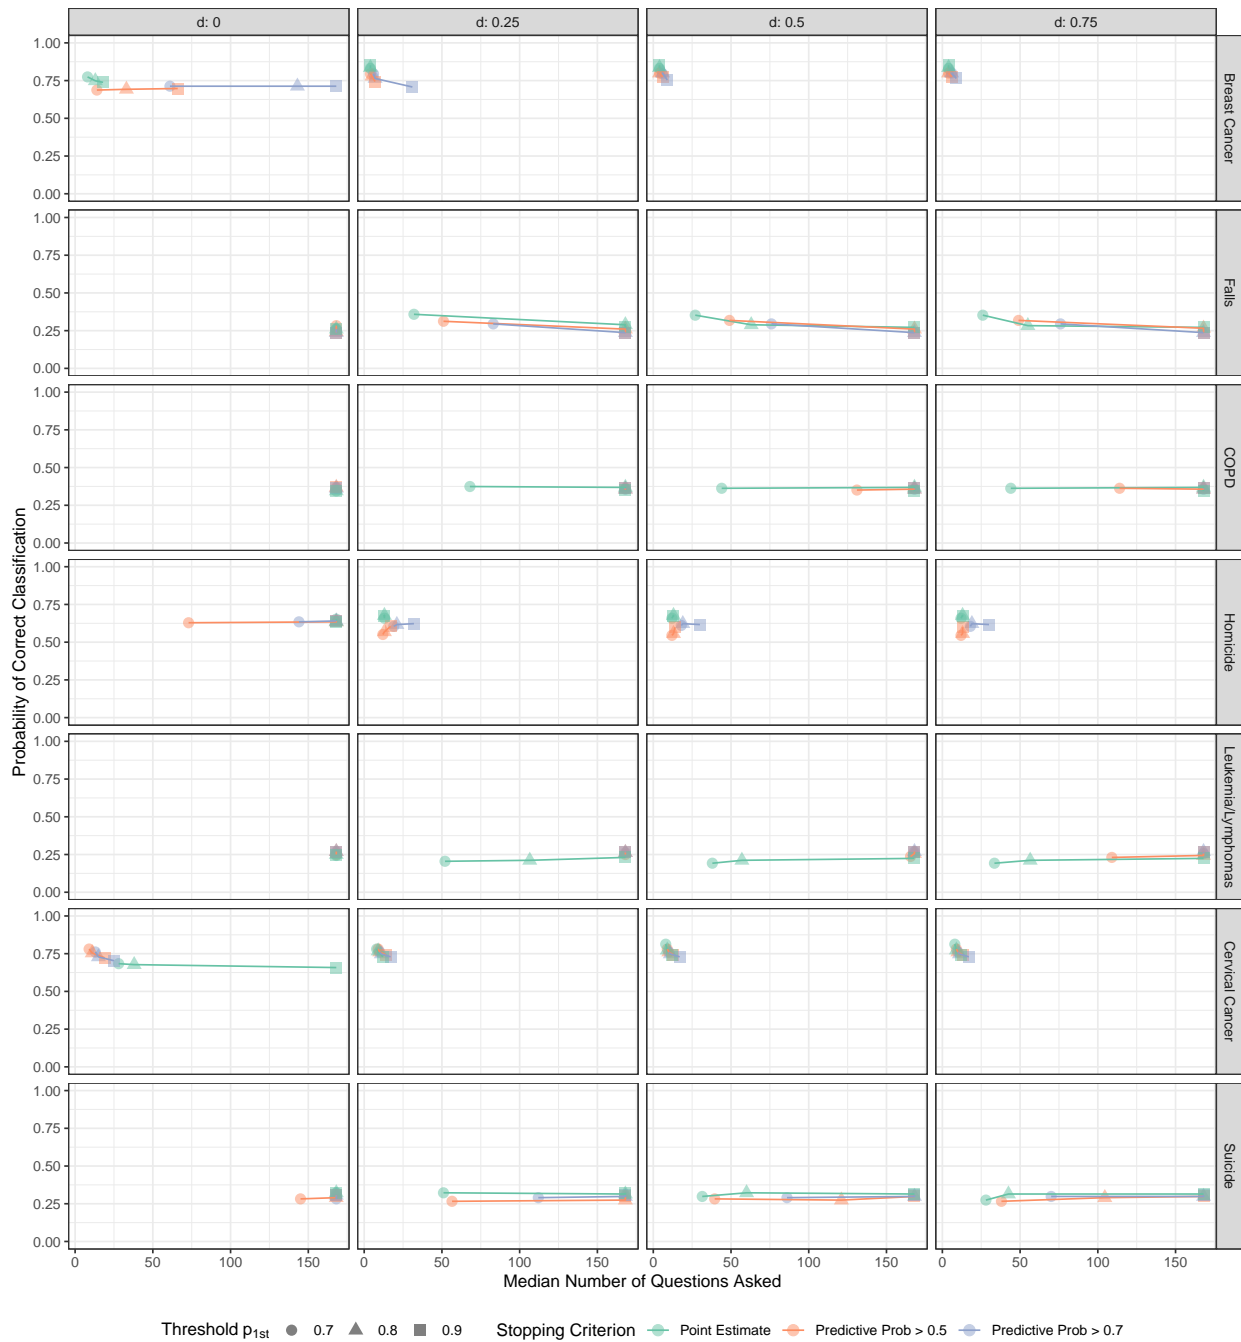

Figure 3: (Continued) Proportion of correctly classified deaths among deaths due to each cause using different stopping criteria. The causes are ordered by their sample size in the PHMRC data.

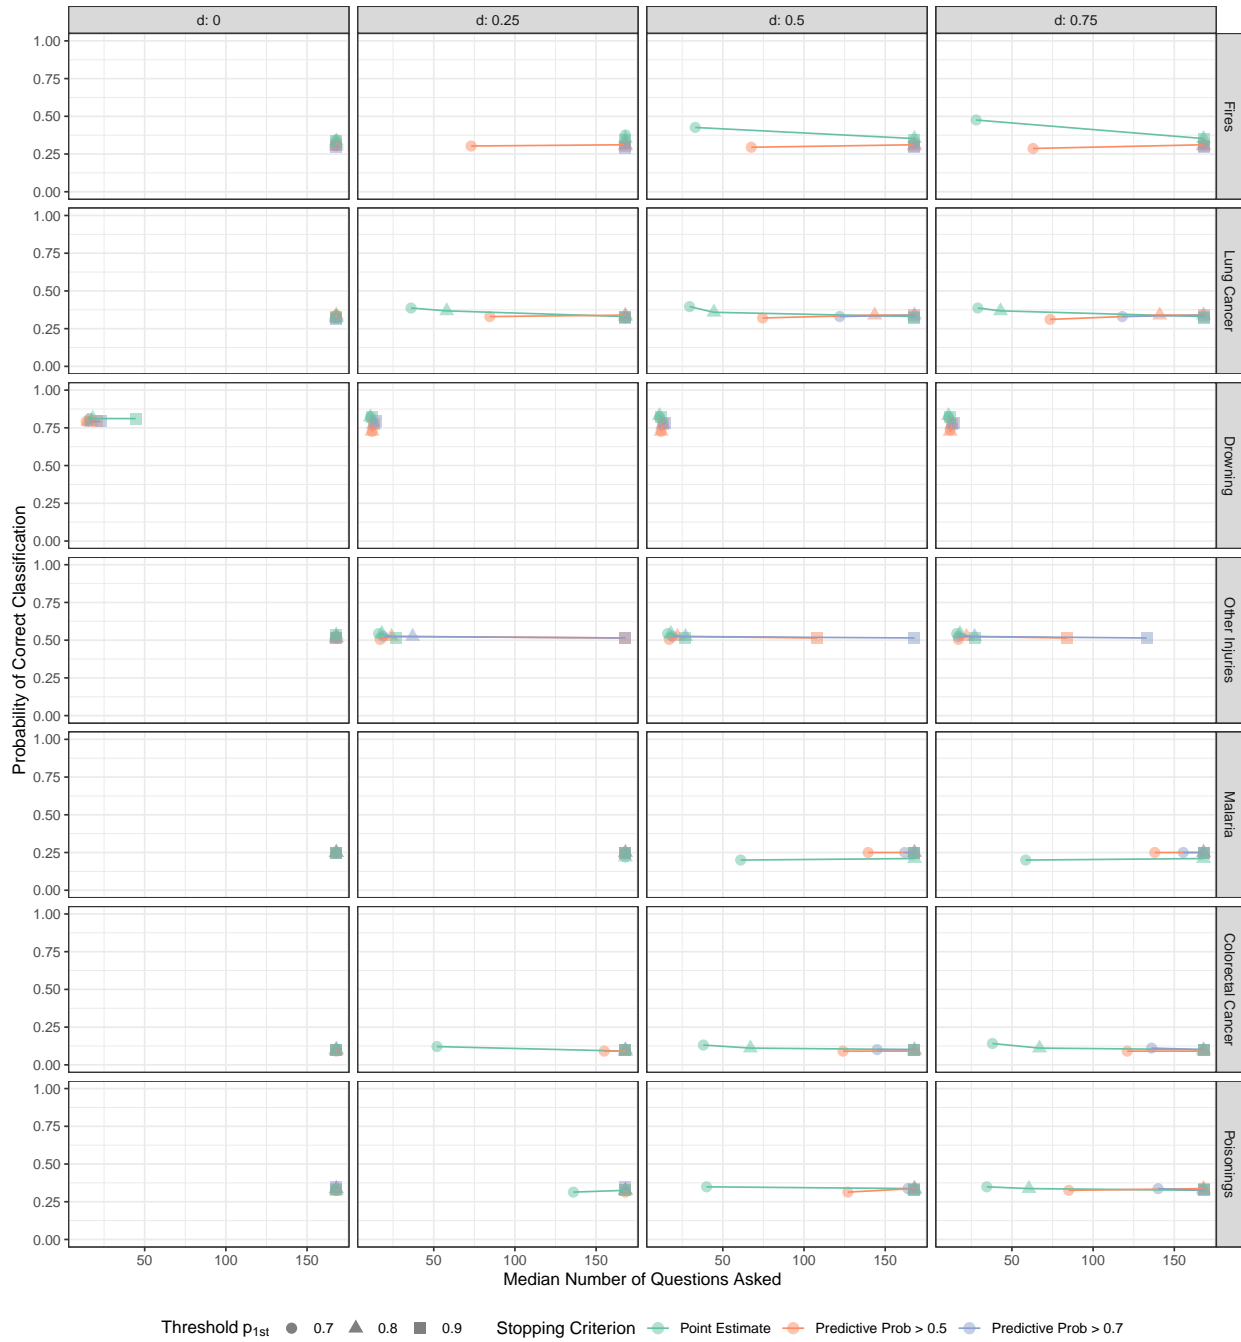

Figure 4: (Continued) Proportion of correctly classified deaths among deaths due to each cause using different stopping criteria. The causes are ordered by their sample size in the PHMRC data.



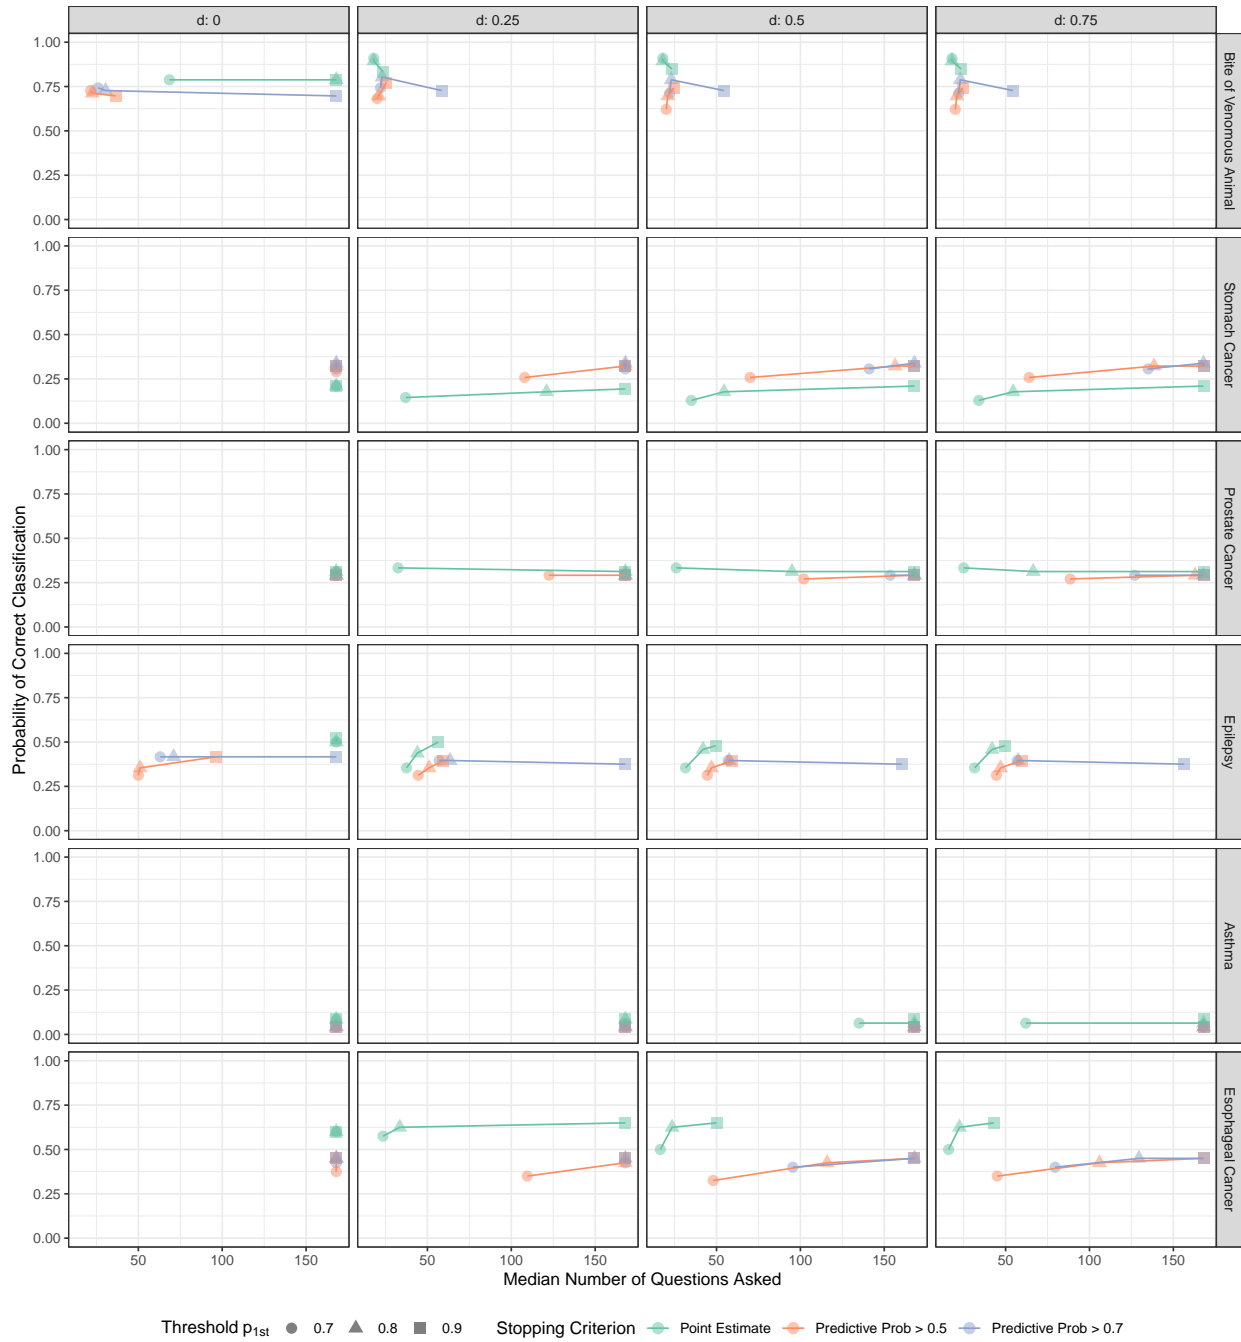

Figure 5: (Continued) Proportion of correctly classified deaths among deaths due to each cause using different stopping criteria. The causes are ordered by their sample size in the PHMRC data.
